# Supplementary material
Source: PubMed Central journal article supplement (PMC8259710)
Supplement: NIHMS1709598-supplement-Supplementary_material.pdf [file NIHMS1709598-supplement-Supplementary_material.pdf]

## SUPPLEMENTAL MATERIALS

### **Monosomy X in female mice influences the regional formation and augments the severity of angiotensin II-induced aortopathies**

Yasir AlSiraj<sup>1</sup>, Sean E. Thatcher<sup>1</sup>, Eric Blalock<sup>1</sup>, Wesley N. Saintilnord<sup>2</sup>, Alan Daugherty<sup>3-4</sup>, Hong S. Lu<sup>3-4</sup>, Wei Luo<sup>5</sup>, Ying H. Shen<sup>5</sup>, Scott A. LeMaire<sup>5</sup>, Arthur P. Arnold<sup>6</sup>, Lisa A. Cassis<sup>1\*</sup>

<sup>1</sup>Department of Pharmacology and Nutritional Sciences, University of Kentucky, Lexington KY

<sup>2</sup>Department of Molecular and Cellular Biochemistry, University of Kentucky, Lexington, KY

<sup>3</sup>Department of Physiology, University of Kentucky, Lexington KY

<sup>4</sup>Saha Cardiovascular Research Center, University of Kentucky, Lexington KY

<sup>5</sup>Division of Cardiothoracic Surgery, Michael E. DeBakey Department of Surgery, Baylor College of Medicine, and Department of Cardiovascular Surgery, Texas Heart Institute, Houston TX

<sup>6</sup>Integrative Biology and Physiology, University of California, Los Angeles CA

**A**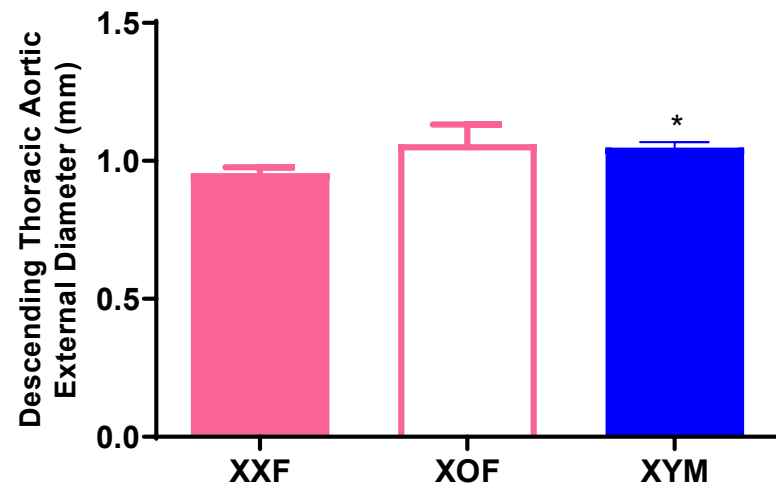**B**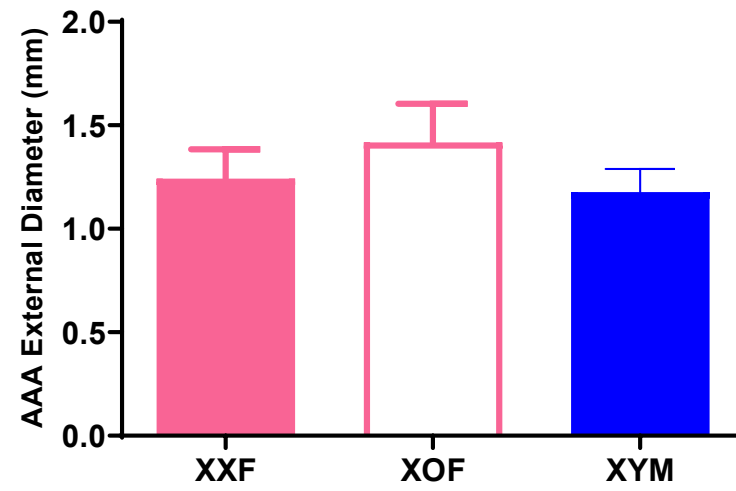

**Supplemental Figure I.** Maximal external diameters of descending thoracic aortas (A) and abdominal aortas (B) of C57Bl/6J mice infused with AngII for 28 days. \*, P<0.05 compared to XXF.

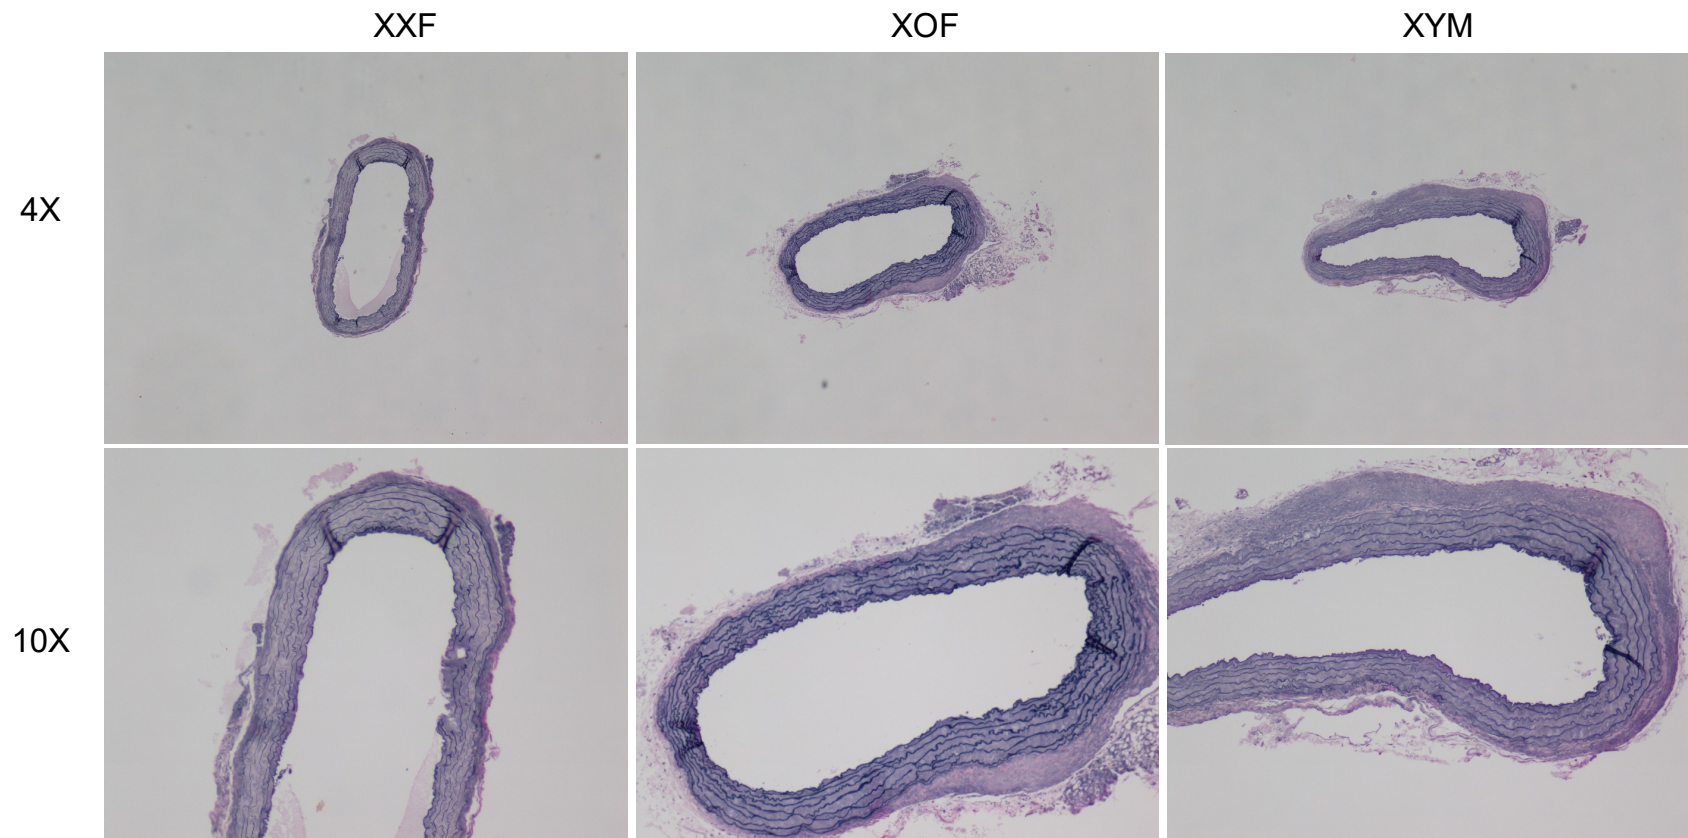

**Supplemental Figure II.** Morphology of representative ascending aorta from XXF, XOF, and XYM C57BL/6J mice (n = 1/genotype) infused with AngII for 28 days. Representative tissue sections stained with Van Gieson.

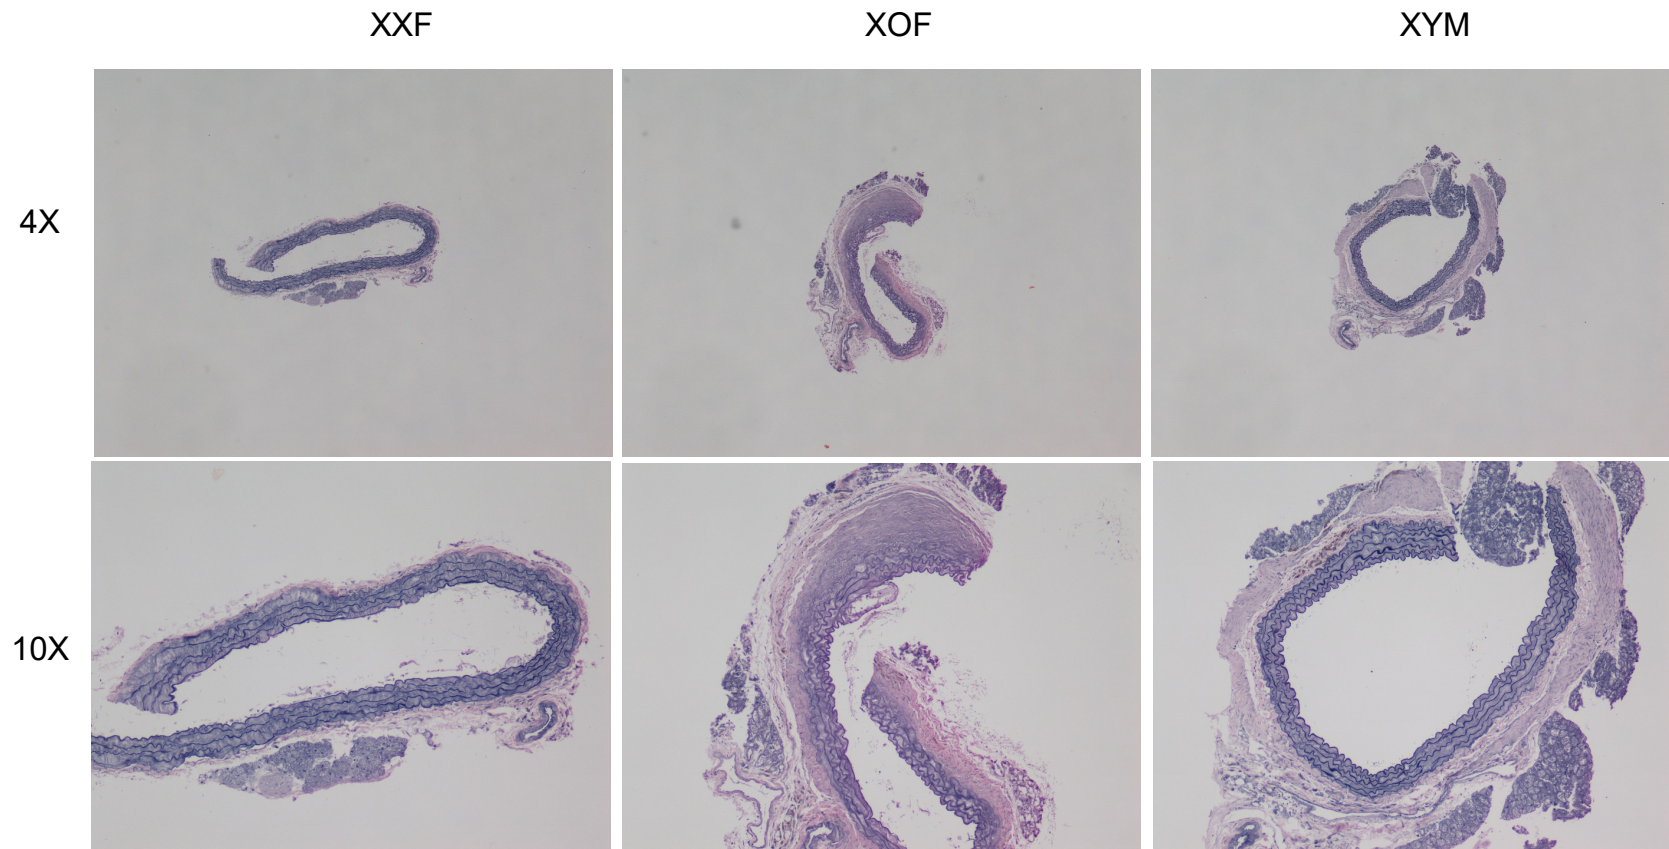

**Supplemental Figure III.** Morphology of representative descending thoracic aortas from XXF, XOF, and XYM *Ldl<sup>r/-</sup>* mice (n = 1/genotype) infused with AngII for 28 days. Representative tissue sections stained with Van Gieson.

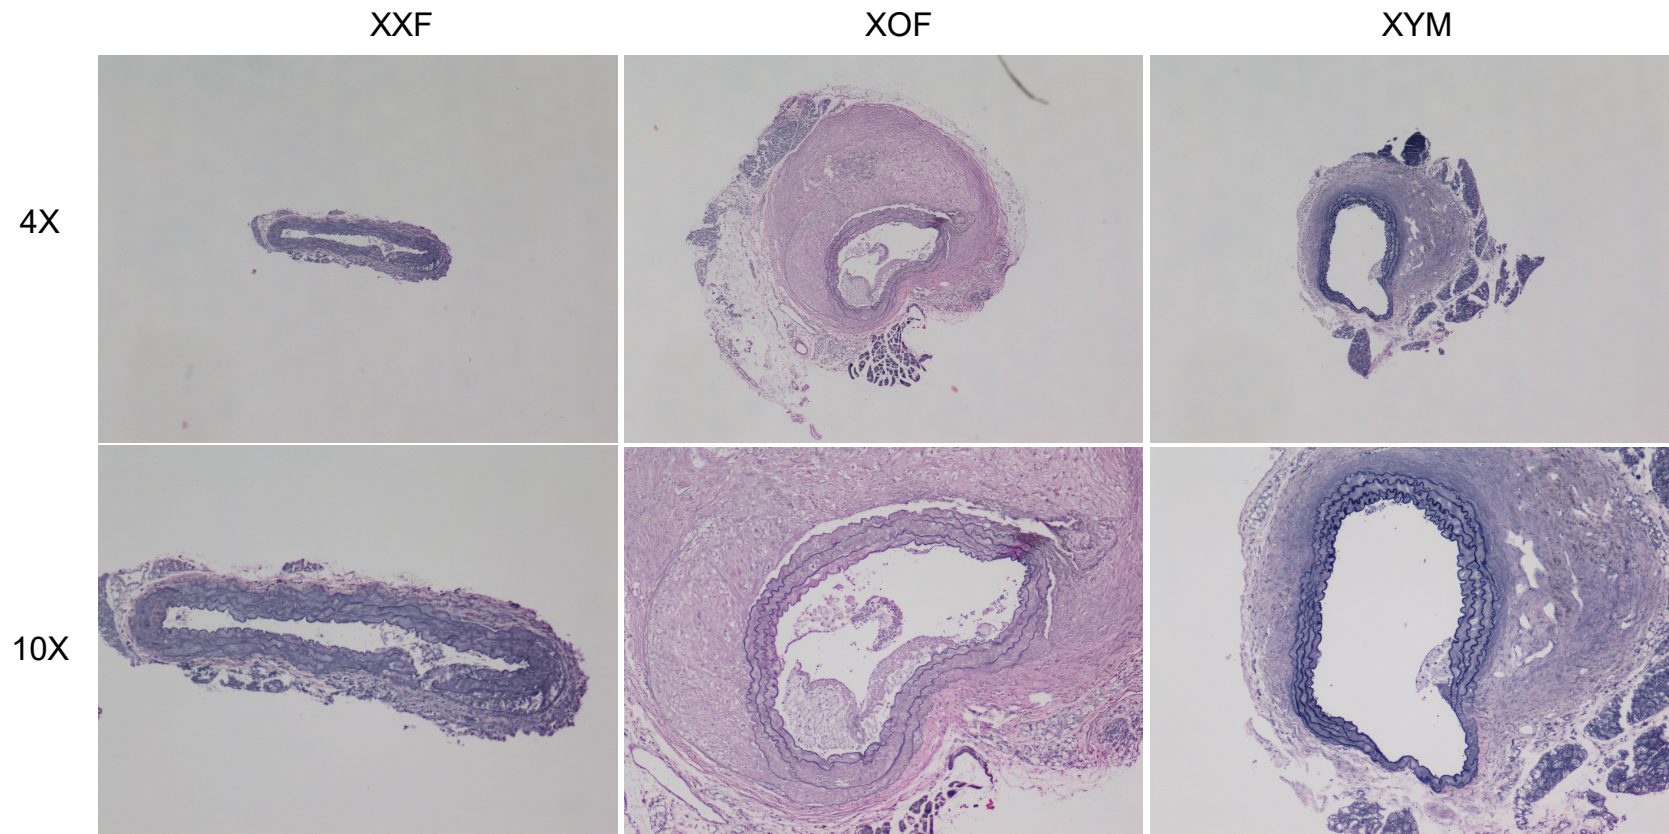

**Supplemental Figure IV.** Morphology of representative abdominal aortas from XXF, XOF, and XYM *Ldlr*<sup>-/-</sup> mice (n = 1/genotype) infused with AngII for 28 days. Representative tissue sections stained with Van Gieson.

## Major Resources Table

In order to allow validation and replication of experiments, all essential research materials listed in the Methods should be included in the Major Resources Table below. Authors are encouraged to use public repositories for protocols, data, code, and other materials and provide persistent identifiers and/or links to repositories when available. Authors may add or delete rows as needed.

### Animals (in vivo studies)

| Species | Vendor or Source                | Background Strain                       | Sex               | Persistent ID / URL |
|---------|---------------------------------|-----------------------------------------|-------------------|---------------------|
| Mice    | Donation from Dr. Arthur Arnold | C57BL/6J and <i>Ldlr</i> <sup>-/-</sup> | Males and females |                     |
|         |                                 |                                         |                   |                     |
|         |                                 |                                         |                   |                     |

### Genetically Modified Animals

|                 | Species | Vendor or Source   | Background Strain          | Other Information | Persistent ID / URL |
|-----------------|---------|--------------------|----------------------------|-------------------|---------------------|
| Parent - Male   |         |                    |                            |                   |                     |
| Parent - Female | Mice    | Jackson laboratory | <i>Ldlr</i> <sup>-/-</sup> |                   | Stock#002207        |

### Antibodies

| Target antigen | Vendor or Source | Catalog # | Working concentration | Lot # (preferred but not required) | Persistent ID / URL |
|----------------|------------------|-----------|-----------------------|------------------------------------|---------------------|
|                |                  |           |                       |                                    |                     |
|                |                  |           |                       |                                    |                     |

### DNA/cDNA Clones

| Clone Name | Sequence | Source / Repository | Persistent ID / URL |
|------------|----------|---------------------|---------------------|
|            |          |                     |                     |
|            |          |                     |                     |
|            |          |                     |                     |

### Cultured Cells

| Name | Vendor or Source | Sex (F, M, or unknown) | Persistent ID / URL |
|------|------------------|------------------------|---------------------|
|      |                  |                        |                     |
|      |                  |                        |                     |
|      |                  |                        |                     |

### Data & Code Availability

| Description                                  | Source / Repository     | Persistent ID / URL                                                                                                                     |
|----------------------------------------------|-------------------------|-----------------------------------------------------------------------------------------------------------------------------------------|
| RNAseq raw (FastQ) and normalized (TMM) data | Gene Expression Omnibus | <a href="https://www.ncbi.nlm.nih.gov/geo/query/acc.cgi?acc=GSE154036">https://www.ncbi.nlm.nih.gov/geo/query/acc.cgi?acc=GSE154036</a> |
|                                              |                         |                                                                                                                                         |
|                                              |                         |                                                                                                                                         |

### Other

| Description | Source / Repository | Persistent ID / URL |
|-------------|---------------------|---------------------|
|             |                     |                     |

DOI [to be added]
